# Supplementary material for: HDAC activity is dispensable for repression of cell-cycle genes by DREAM and E2F:RB complexes
Source: PubMed Central journal article supplement (PMC11126580; doi:10.1038/s41467-024-48724-0), 2024-05-24
Supplement: 41467_2024_48724_MOESM3_ESM.pdf [file 41467_2024_48724_MOESM3_ESM.pdf]

### **Description of Additional Supplementary Files**

File Name: Supplementary Data 1

Description: Sequences of oligonucleotides used in this study.

File Name: Supplementary Data 2

Description: Antibodies used in this study.

File Name: Supplementary Data 3

Description: G1/S, G2/M, and non-DREAM/non-cell cycle regulated control genes selected to generate Fig. 1.

File Name: Supplementary Data 4

Description: Differentially expressed genes in SIN3B<sup>-/-</sup>, SIN3A knockdown, and SIN3B<sup>-/-</sup>;SIN3A knockdown HCT116 cells.
